# Supplementary material for: Loss of health related quality of life following low-trauma fractures in the elderly
Source: Springer Nature journal article supplement (doi:10.1186/s12877-016-0259-5), 2016-04-19
Supplement: MOESM1 [file 10038684]

Additional file 1: List of ICD-10 CA codes by type of fracture

| <b>Fracture type</b>                                                                             | <b>ICD-10 codes relating to fracture type</b>    |
|--------------------------------------------------------------------------------------------------|--------------------------------------------------|
| Hip                                                                                              | S72.0, S72.1, S72.2                              |
| Humerus                                                                                          | S42.2                                            |
| Vertebral                                                                                        | S22.0, S22.1, S32.0                              |
| Wrist                                                                                            | S52 with CCI codes                               |
| Other sites:                                                                                     |                                                  |
| <ul style="list-style-type: none"> <li>• Femur</li> </ul>                                        | S72.3, S72.4, S72.7 S72.8, S72.9                 |
| <ul style="list-style-type: none"> <li>• Lower leg (tibia, fibula, ankle, knee, foot)</li> </ul> | S82.0-S82.9 (excludes ankle), S92                |
| <ul style="list-style-type: none"> <li>• Lower arm (radius, ulna)</li> </ul>                     | S52 <i>unless wrist above</i>                    |
| <ul style="list-style-type: none"> <li>• Shoulder, upper arm</li> </ul>                          | S42.0-S42.9 <i>except S42.2</i>                  |
| <ul style="list-style-type: none"> <li>• Ribs/sternum</li> </ul>                                 | S22.2, S22.3, S22.4, S22.8, S22.9                |
| <ul style="list-style-type: none"> <li>• Lower spine, pelvis</li> </ul>                          | S32.1, S32.3, S32.4, S32.5, S32.7, S32.8         |
| Multiple fractures                                                                               | T02.1 - T02.9 ( <i>or more than 1 of above</i> ) |
